# Supplementary material for: STF-62247 and pimozide induce autophagy and autophagic cell death in mouse embryonic fibroblasts
Source: Springer Nature journal article supplement (doi:10.1038/s41598-019-56990-y), 2020-01-20

# **STF-62247 and pimozide induce autophagy and autophagic cell death in mouse embryonic fibroblasts**

Maximilian N. Kinzler<sup>1,3§</sup>, Svenja Zielke<sup>1§</sup>, Simon Kardo<sup>1</sup>, Nina Meyer<sup>2</sup>, Donat Kögel<sup>2</sup>, Sjoerd J. L. van Wijk<sup>\*1</sup>, Simone Fulda <sup>#\*1,3,4</sup>

<sup>1</sup>Institute for Experimental Cancer Research in Pediatrics, Goethe-University Frankfurt, Komturstr. 3a, 60528 Frankfurt, Germany

<sup>2</sup>Experimental Neurosurgery, Goethe-University Hospital, Theodor-Stern-Kai 7, 60590 Frankfurt, Germany

<sup>3</sup>German Cancer Consortium (DKTK), Partner Site Frankfurt, Germany

<sup>4</sup>German Cancer Research Center (DKFZ), Heidelberg, Germany

<sup>§</sup> shared first authorship, \* shared senior authorship, # corresponding author

**Pimozide decreases the levels of the mitochondrial proteins Mfn2 and COXIV in *Atg5*<sup>+/+</sup> and *Atg7*<sup>+/+</sup> cells . STF-26647 decreases levels of COXIV, but not of Mfn2 in *Atg5*<sup>+/+</sup> cells, whereas STF-26647 does not decrease levels of COXIV or Mfn2 in *Atg7*<sup>+/+</sup> cells.** ATG5<sup>+/+</sup> and ATG7<sup>+/+</sup> MEFs were transiently transfected with mCherry-Parkin followed by treatment with 10  $\mu$ M FCCP, 10  $\mu$ M pimozide or 10  $\mu$ M STF-62247 for the indicated time points followed by Western blotting with vinculin as loading control. Uncropped blots are shown in Suppl. Fig. 13. Mfn2 = mitofusin-2

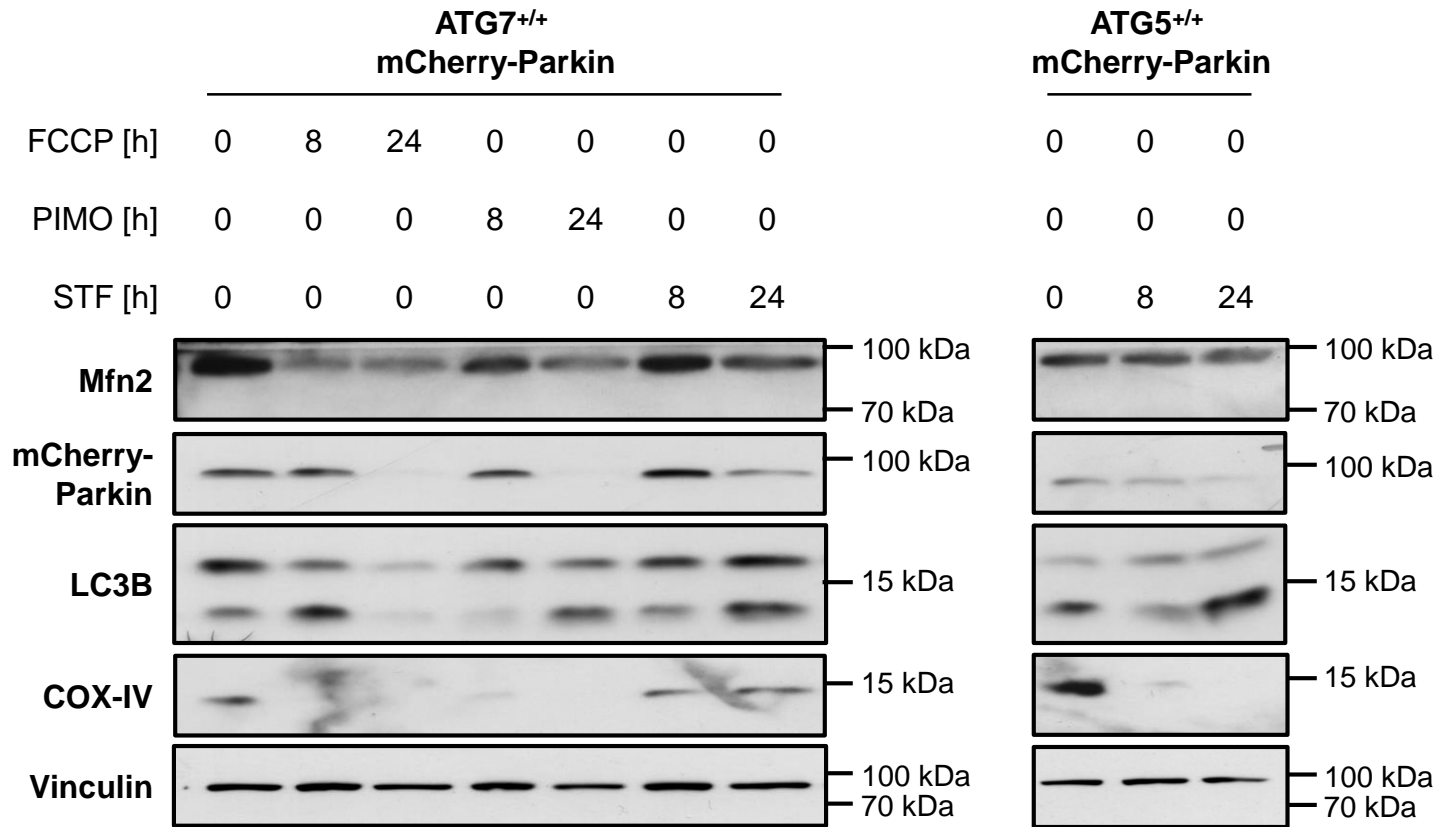

**STF-26647 and pimozide do not induce selective autophagy of MG-132-induced aggregates.**

ATG5<sup>+/+</sup> and ATG5<sup>-/-</sup> MEFs were pre-treated with rapamycin (7.5  $\mu$ M), STF or PIMO at the indicated concentrations for two hours prior to treatment with MG-132 (3  $\mu$ M) and the compounds for 18 hours followed by Western Blotting with GAPDH as loading control. Uncropped blots are shown in Suppl. Fig. 14.

**ATG5<sup>+/+</sup>**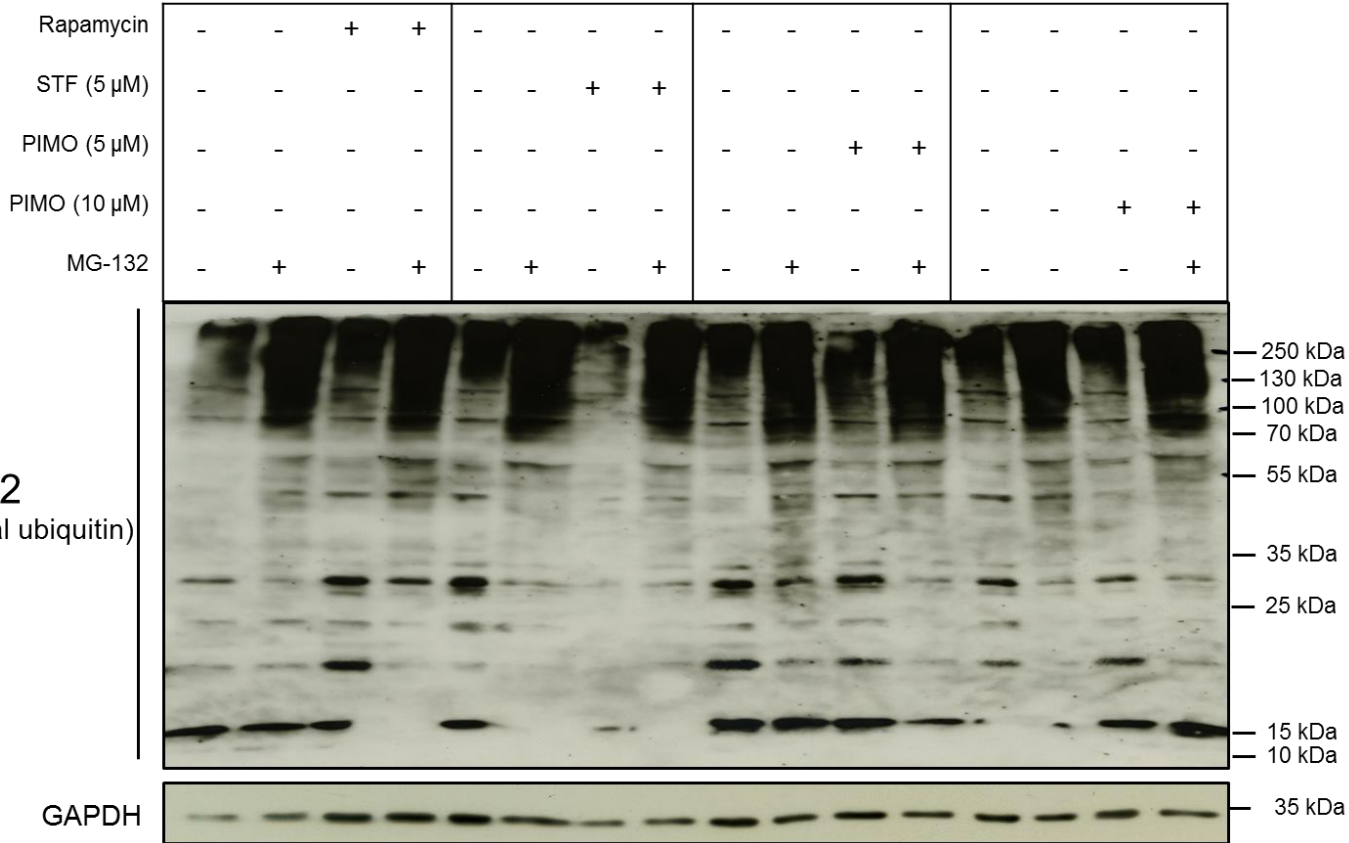**ATG5<sup>-/-</sup>**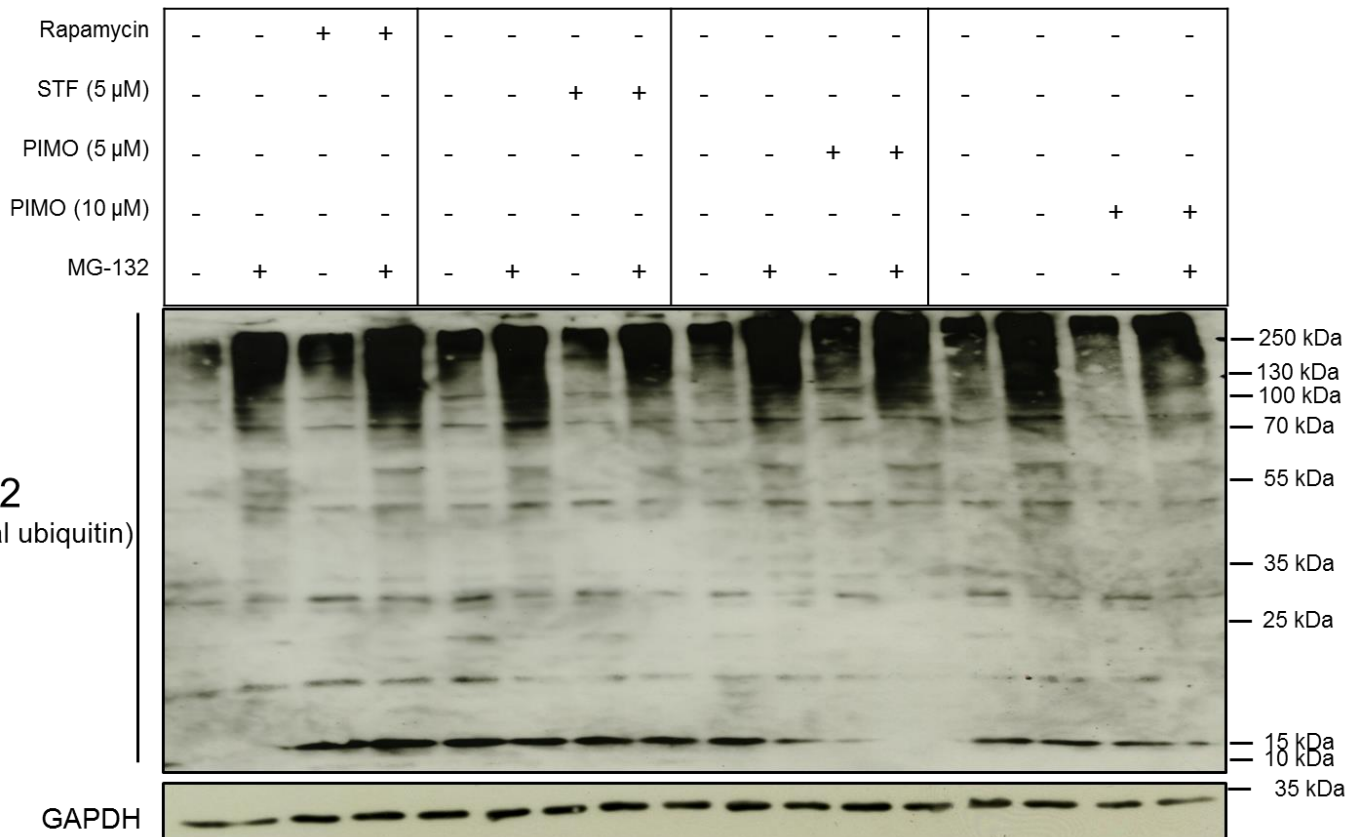

(1) Vinculin, ATG7, LC3B

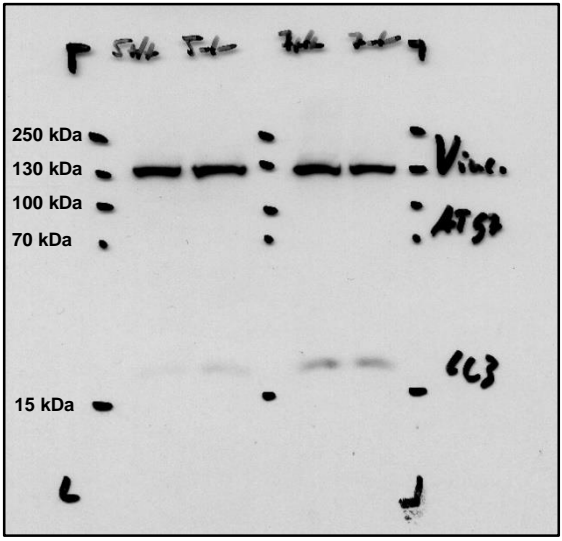

(2) Vinculin, ATG7, LC3B

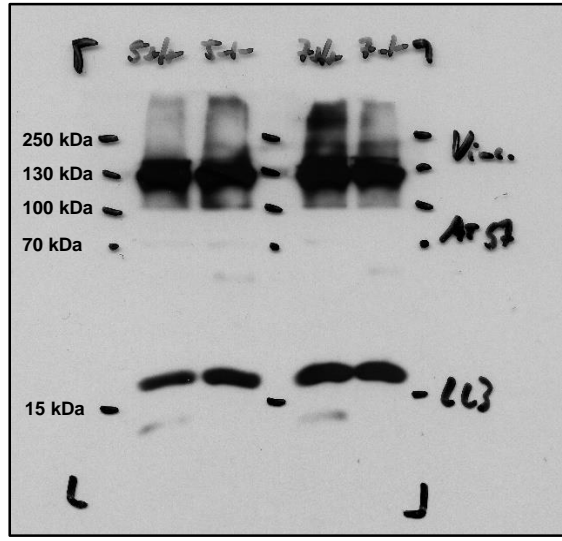

(3) Vinculin, ATG7, LC3B

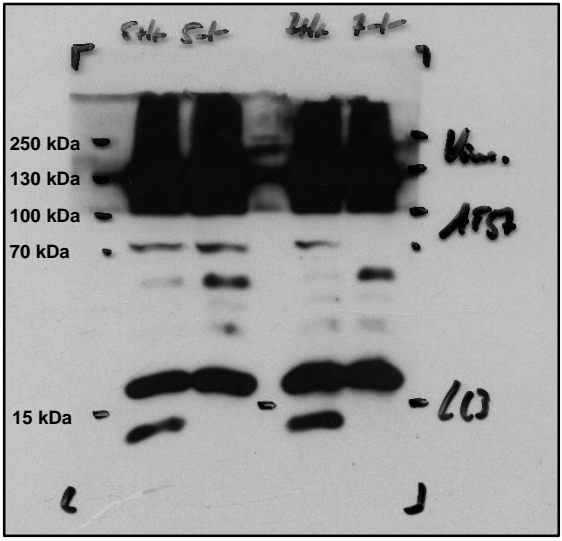

(4) ATG5

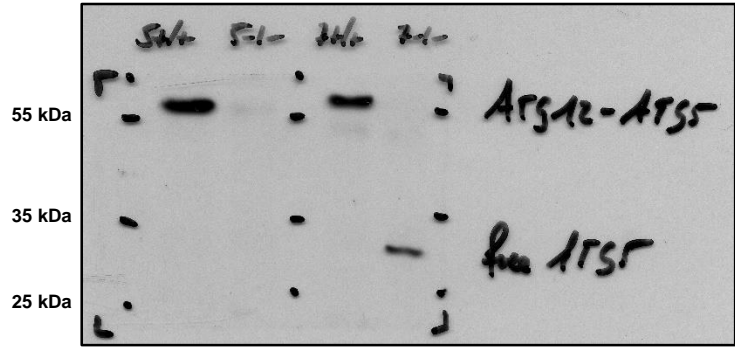

(1) Vinculin, ATG7, ATG5

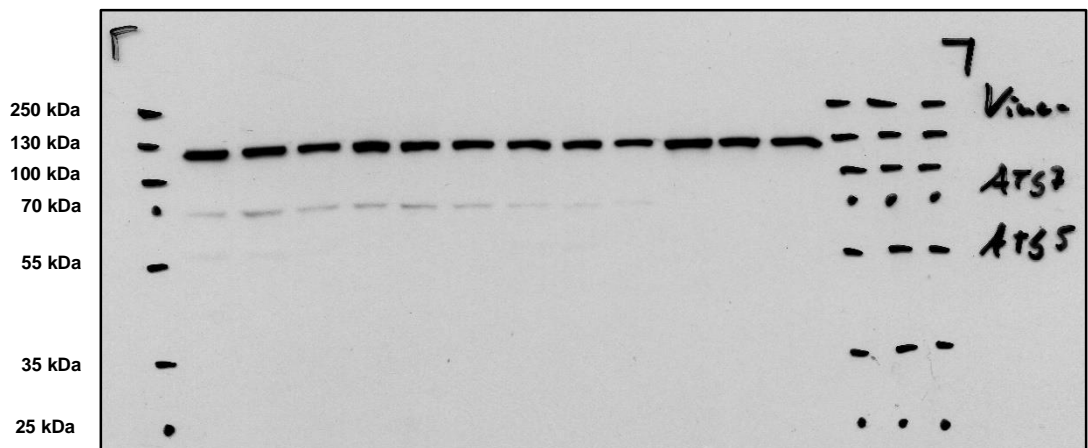

(2) Vinculin, ATG7, ATG5

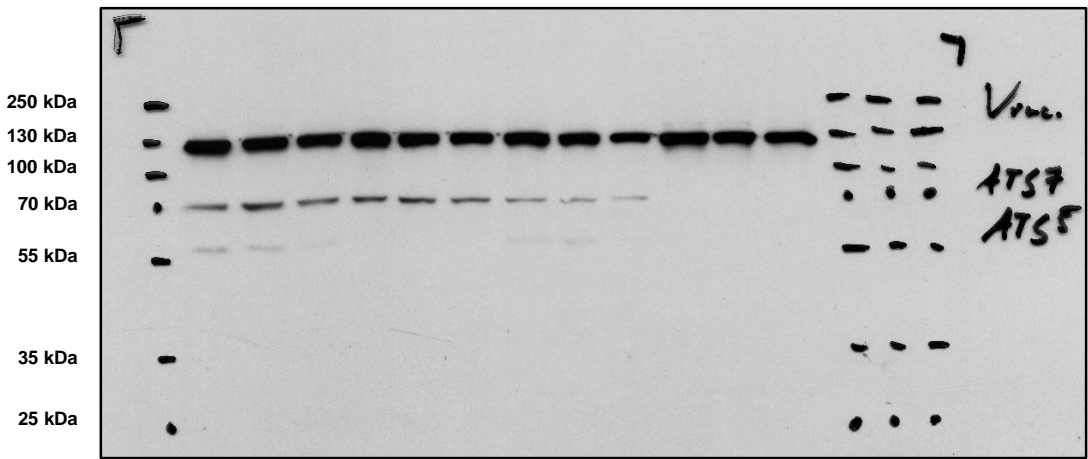

(3) Vinculin, ATG7, ATG5

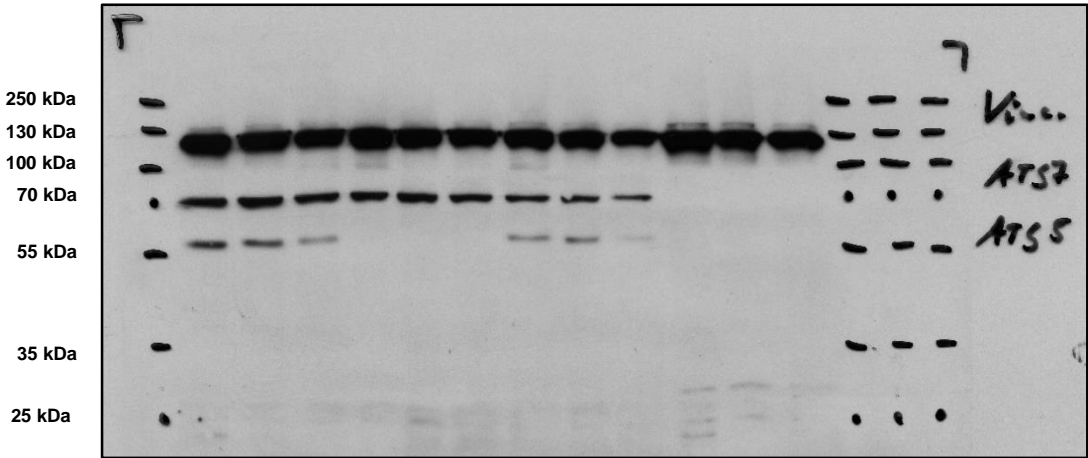

(4) Vinculin, ATG7, ATG5

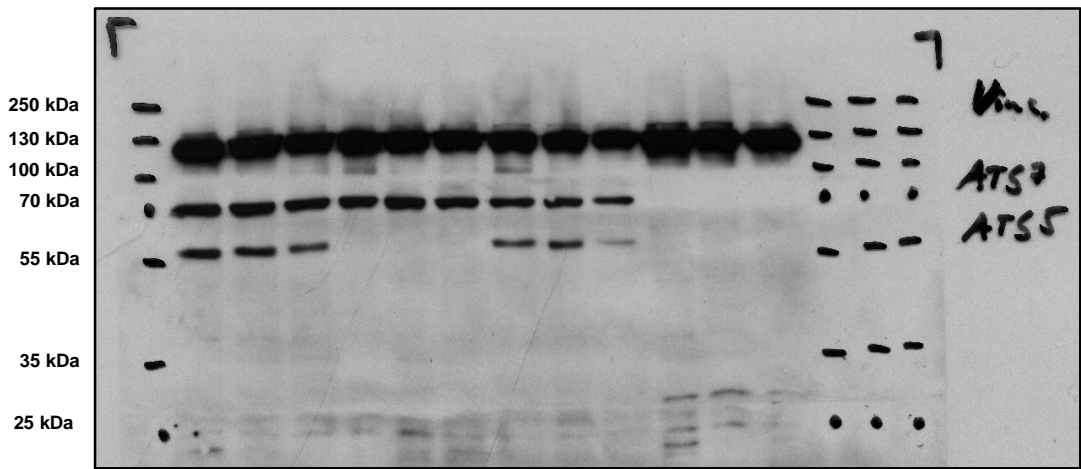

(5) Vinculin

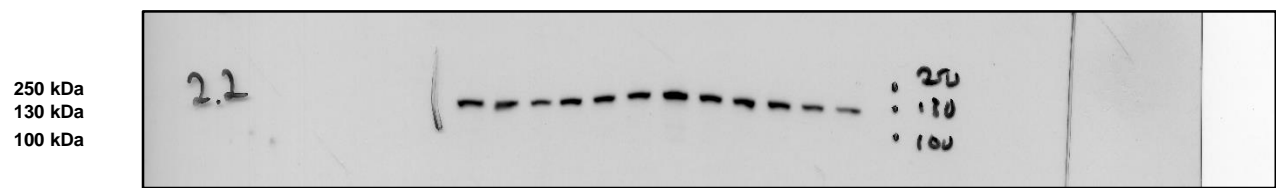

(6) LC3B

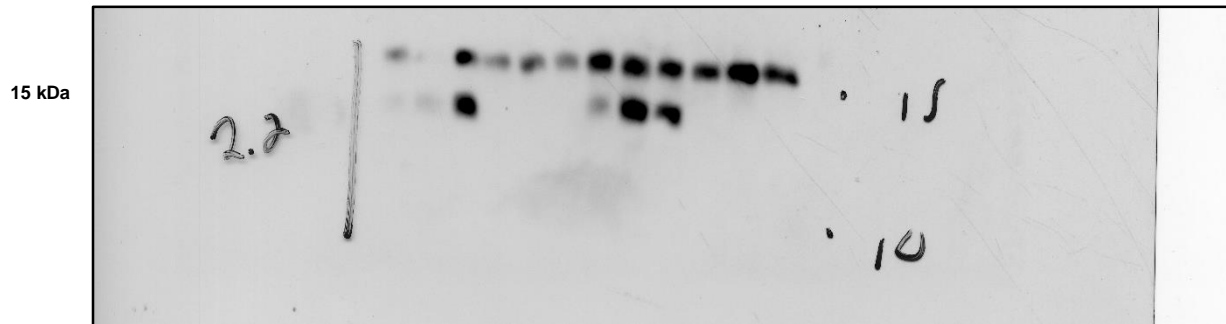

(7) LC3B

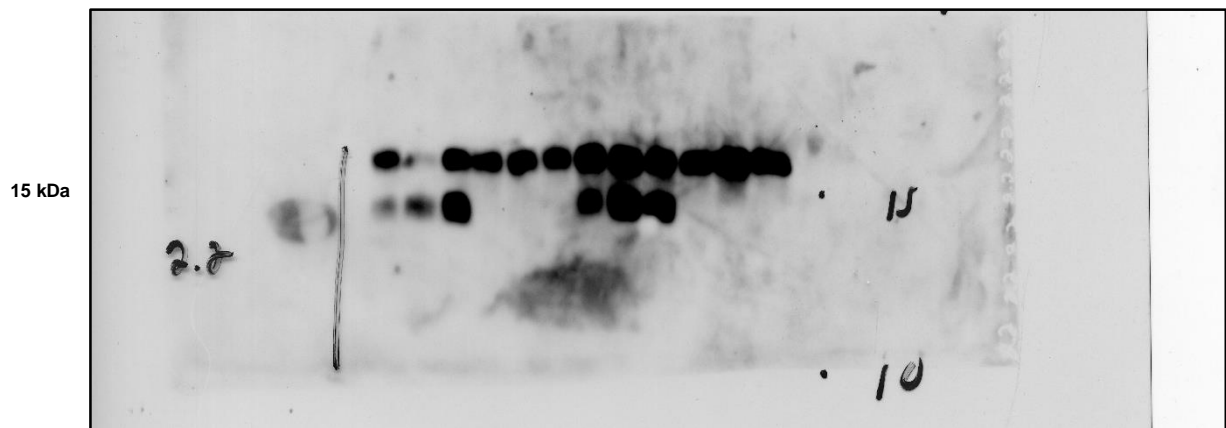

Marked samples are part of the present study.

(1) Vinculin

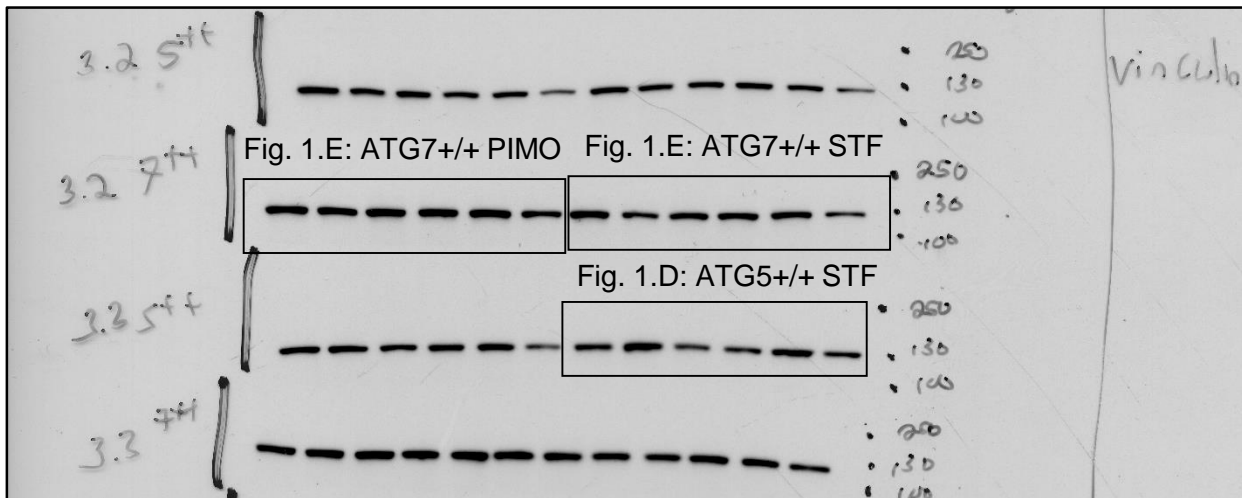

(2) Vinculin

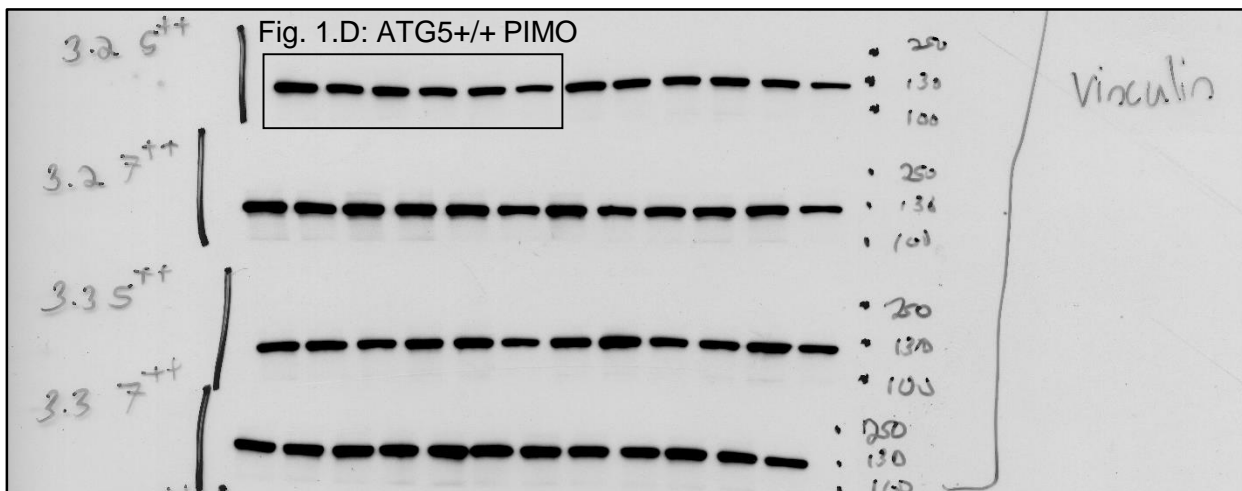

(3) LC3B

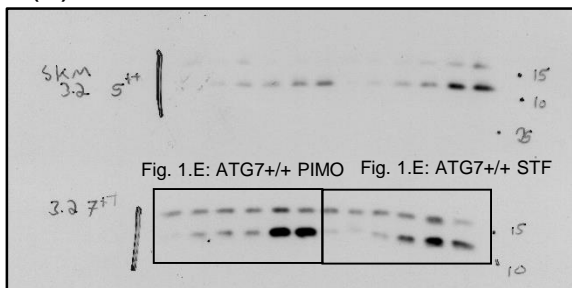

(4) LC3B

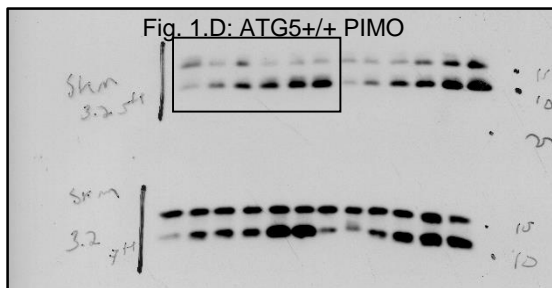

(5) LC3B

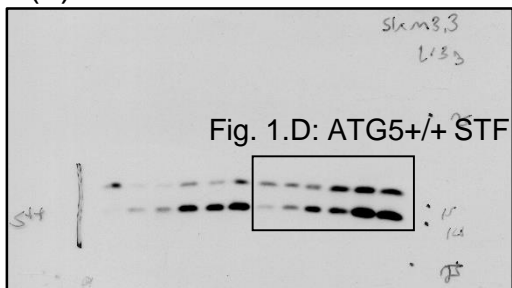



Marked samples are part of the present study.

(1) Vinculin

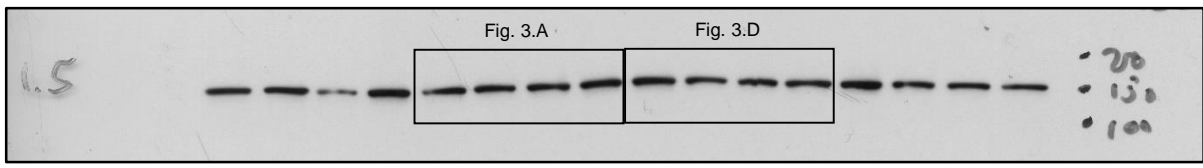

(2) Vinculin

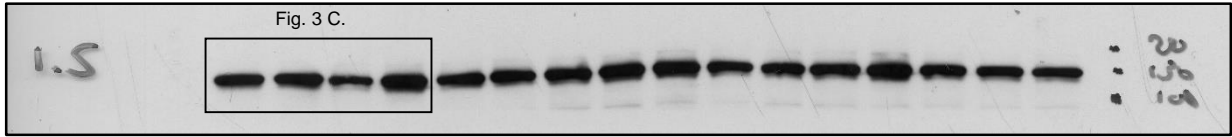

(3) LC3B

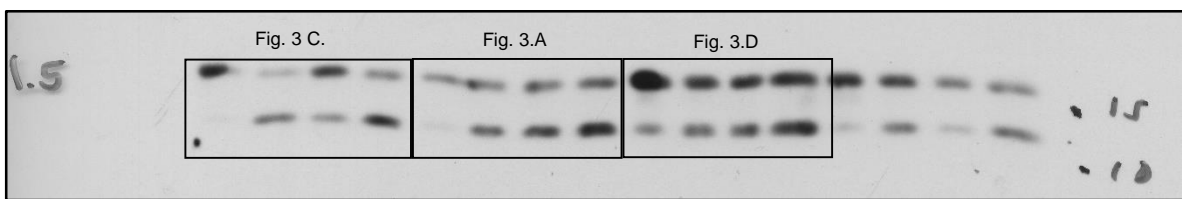

(4) Vinculin

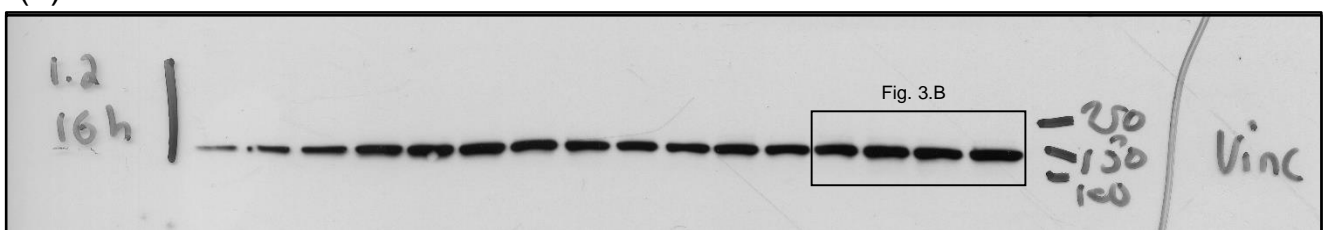

(5) LC3B

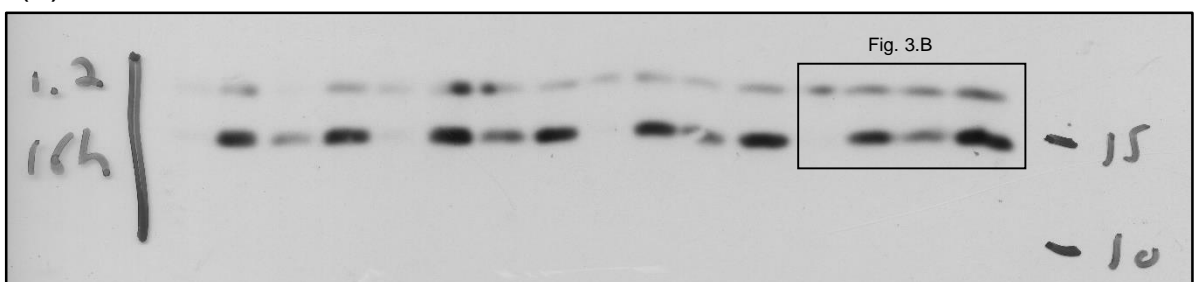

(1) GAPDH

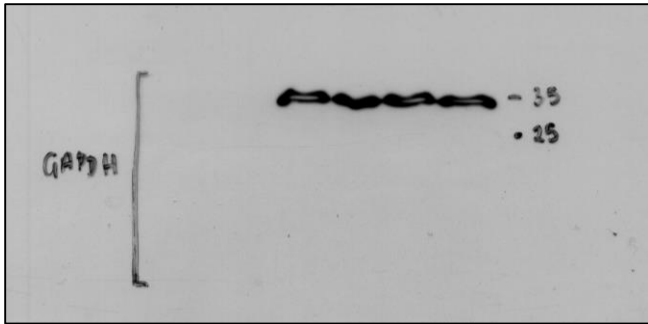

(2) GAPDH

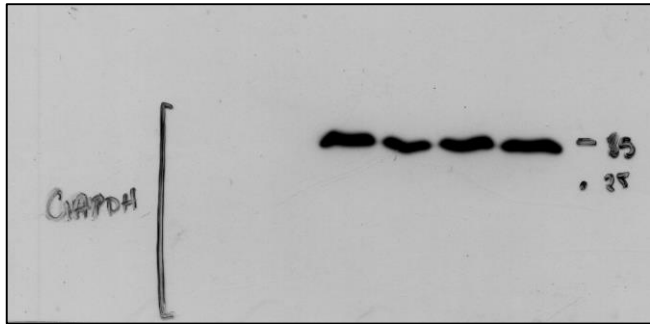

(3) RFP

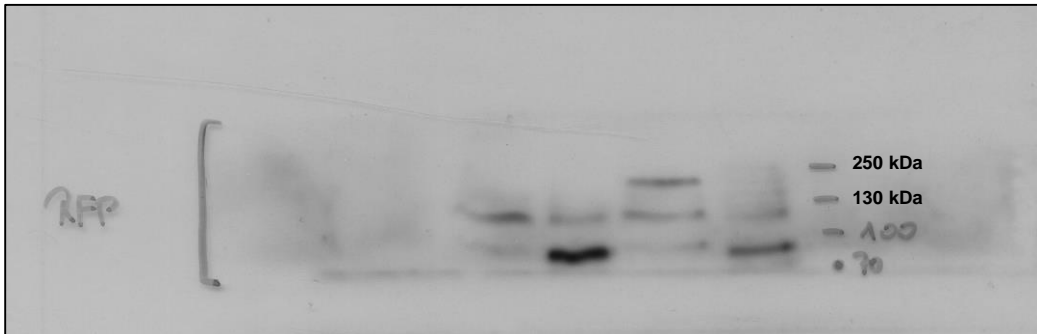

(5) RFP

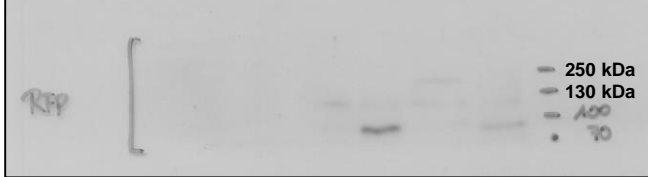

(6) ATG5

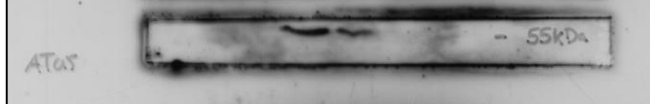

(4) RFP, ATG5

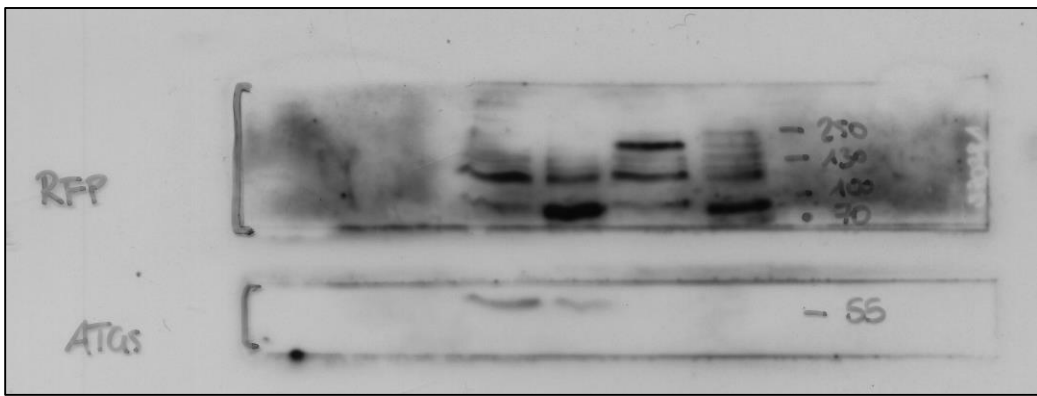

Marked samples are part of the present study. Lysates were loaded onto two different gels (#1 and #2). #1 and #2 indicates which proteins were detected from the respective gel.

(1) GAPDH (#1), GAPDH (#2)

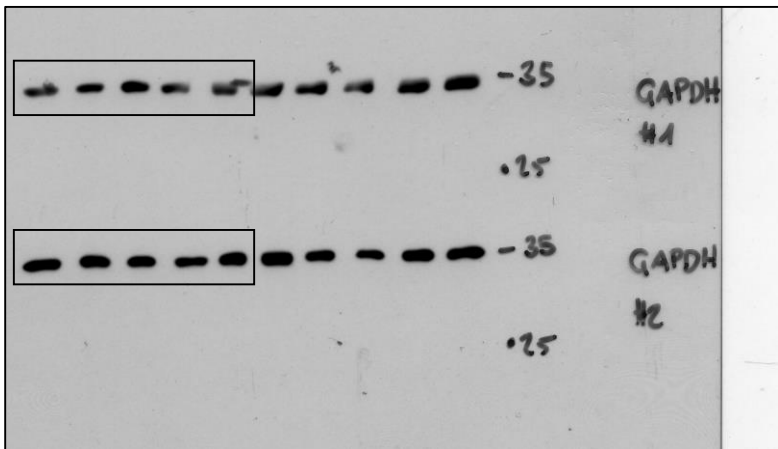

(2) Mitofusin-2 (#1), GAPDH (#1), GAPDH (#2)

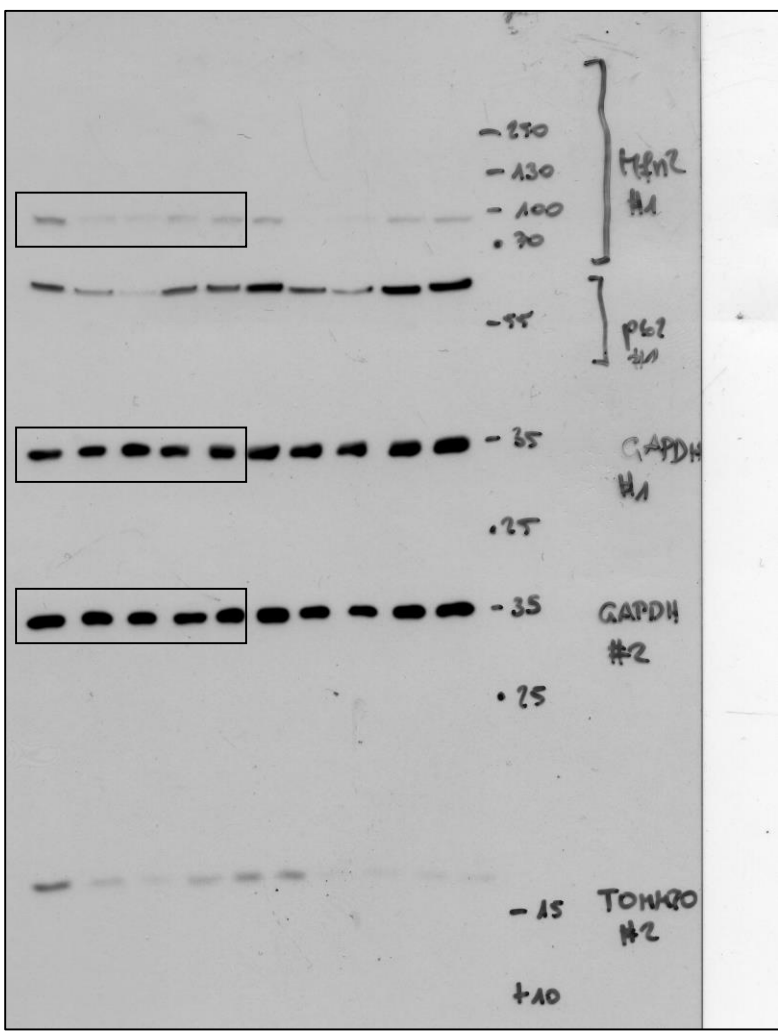

Marked samples are part of the present study. Lysates were loaded onto two different gels (#1 and #2). #1 and #2 indicates which proteins were detected from the respective gel.

(3) Mitofusin-2 (#1), GAPDH (#1), GAPDH (#2)

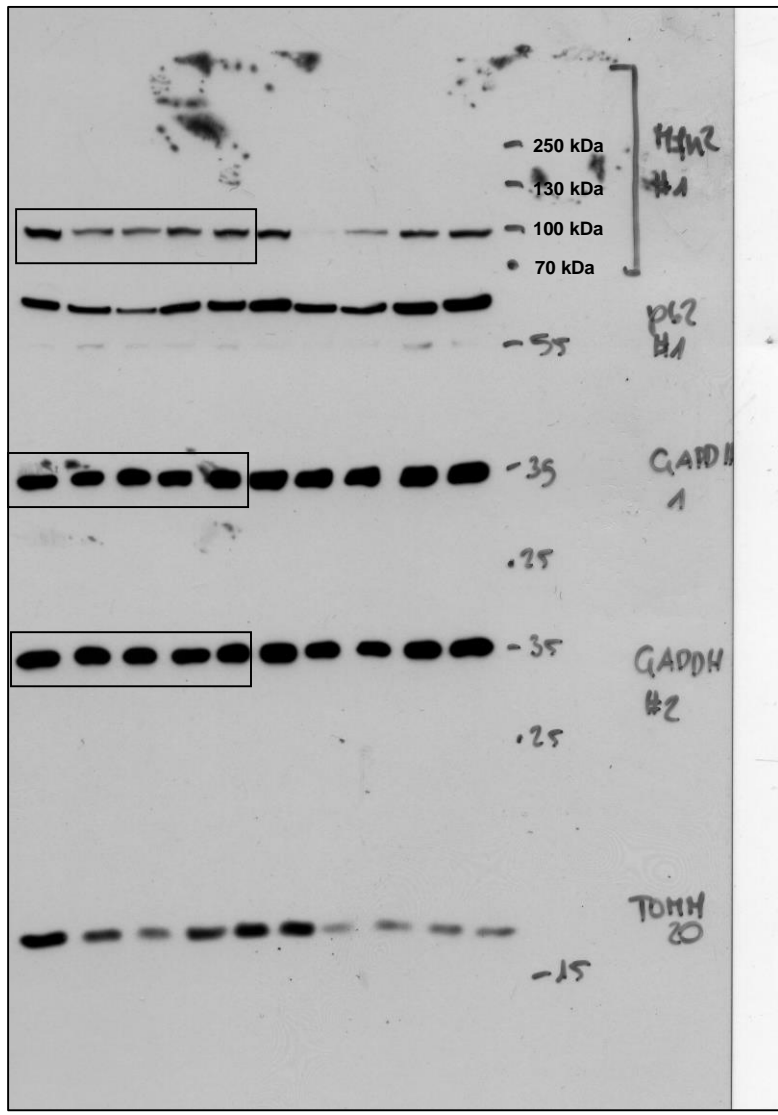

Marked samples are part of the present study. Lysates were loaded onto two different gels (#1 and #2). #1 and #2 indicates which proteins were detected from the respective gel.

(4) COX-IV (#1)

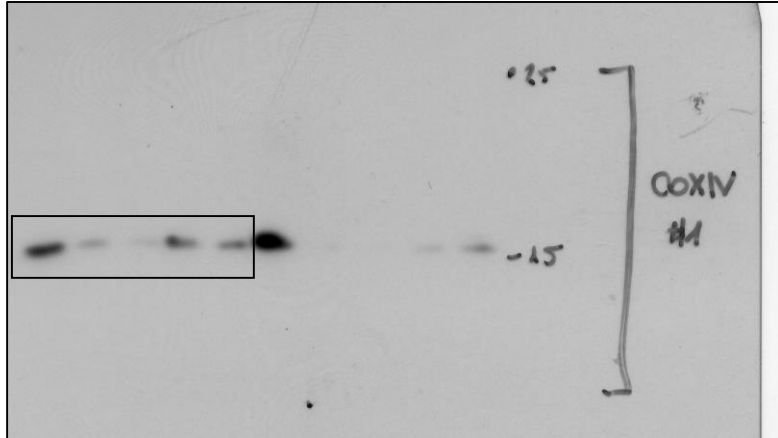

(5) LC3B (#2)

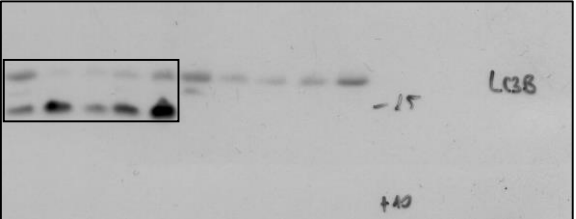

(6) LC3B (#2)

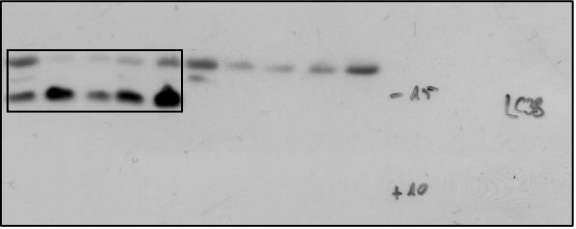

(7) COX-IV (#1), RFP (#2), ATG5 (#2)

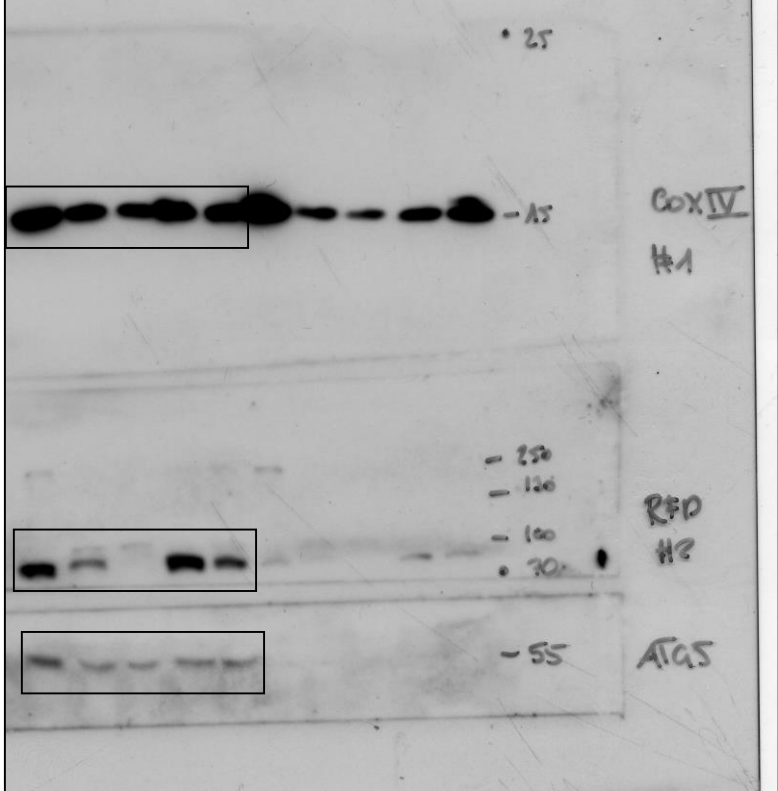

Marked samples are part of the present study.

(1) Mitofusin-2

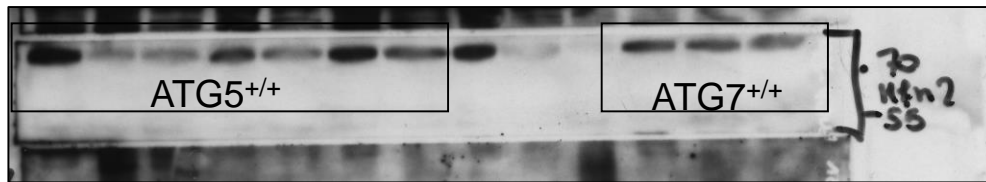

(2) mCherry-Parkin

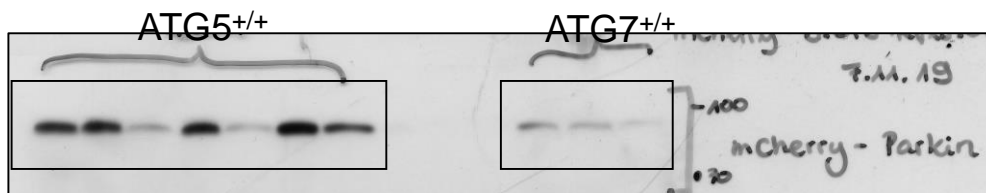

(3) COXIV

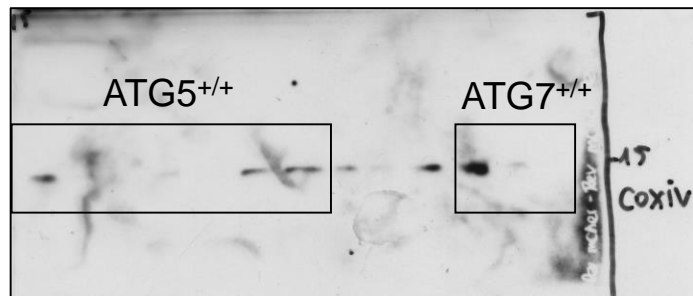

(4) LC3B

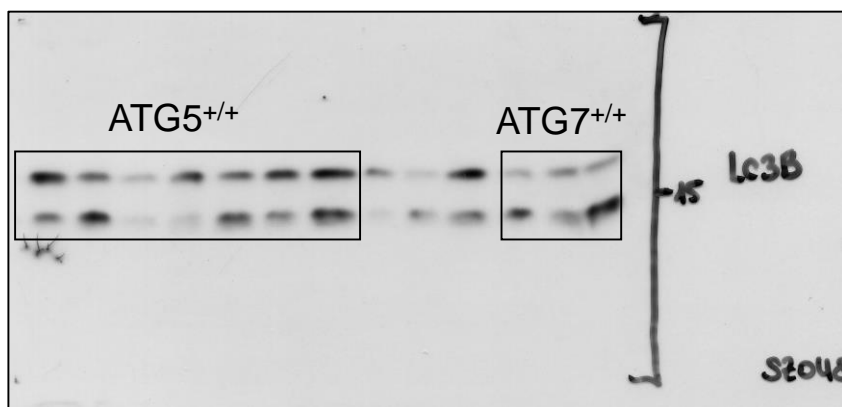

(5) Vinculin

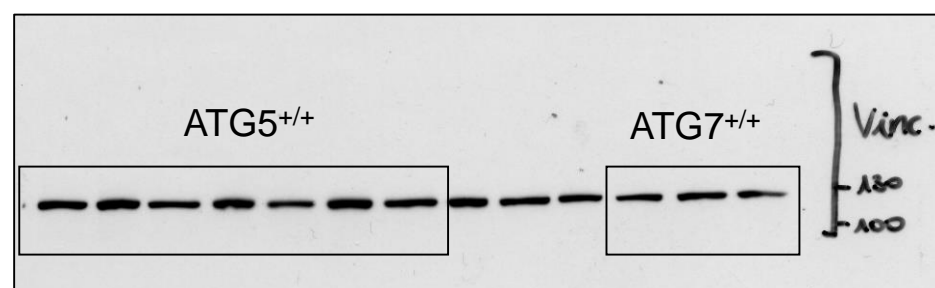

(1) FK2 (total ubiquitin)

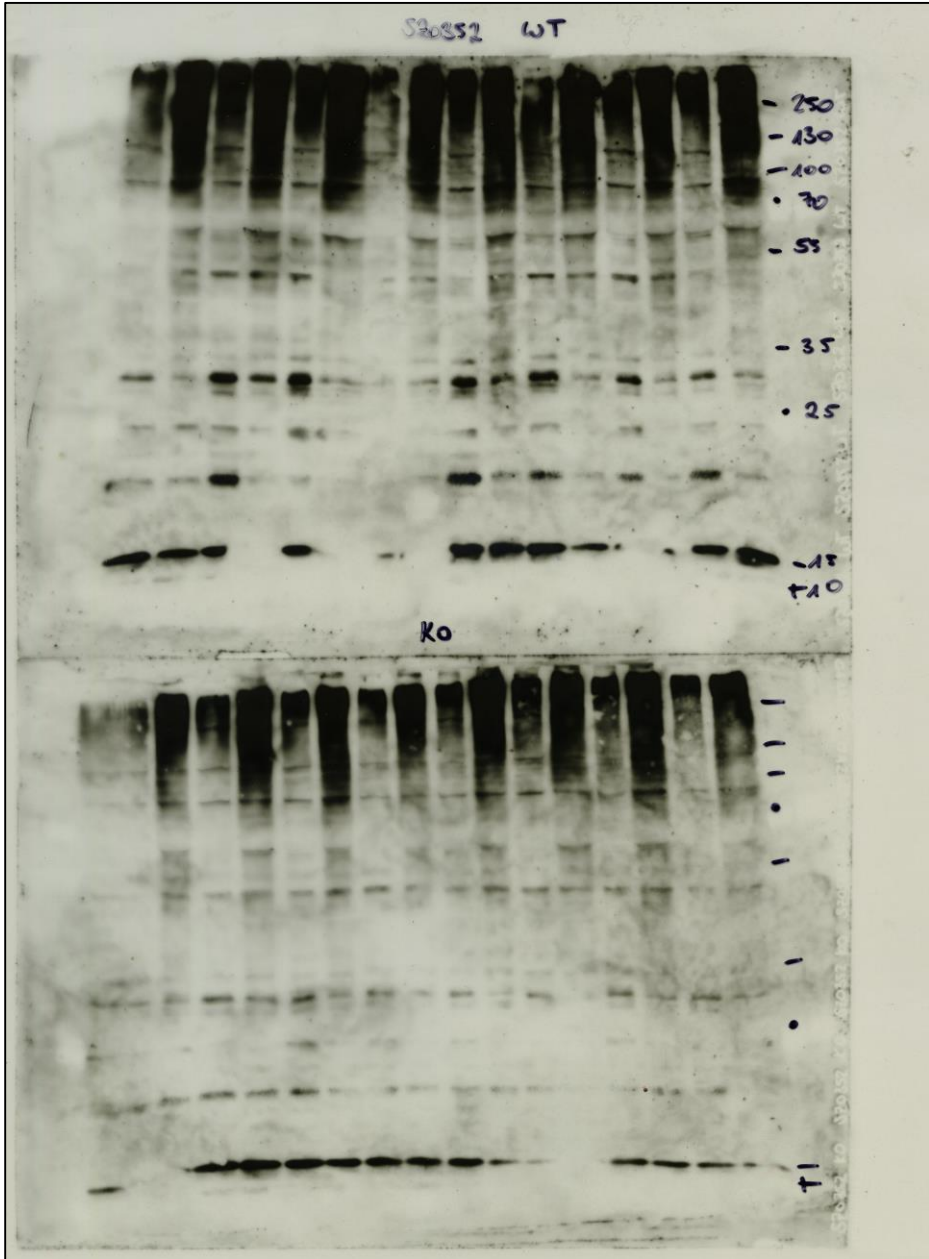

(2) GAPDH

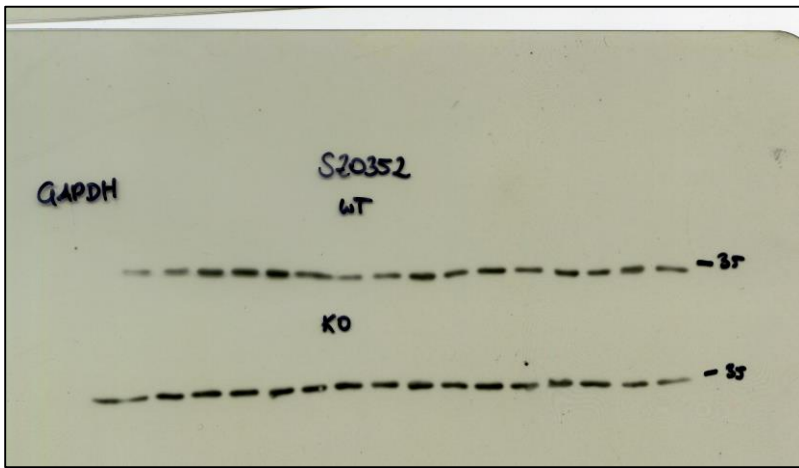

Supplement: MOESM1 [file 41598_2019_56990_MOESM1_ESM.pdf]
